# Supplementary material
Source: Frontiers journal article supplement (https://www.frontiersin.org/articles/213462)
Supplement: Image_7.PDF [file Image_7.PDF]

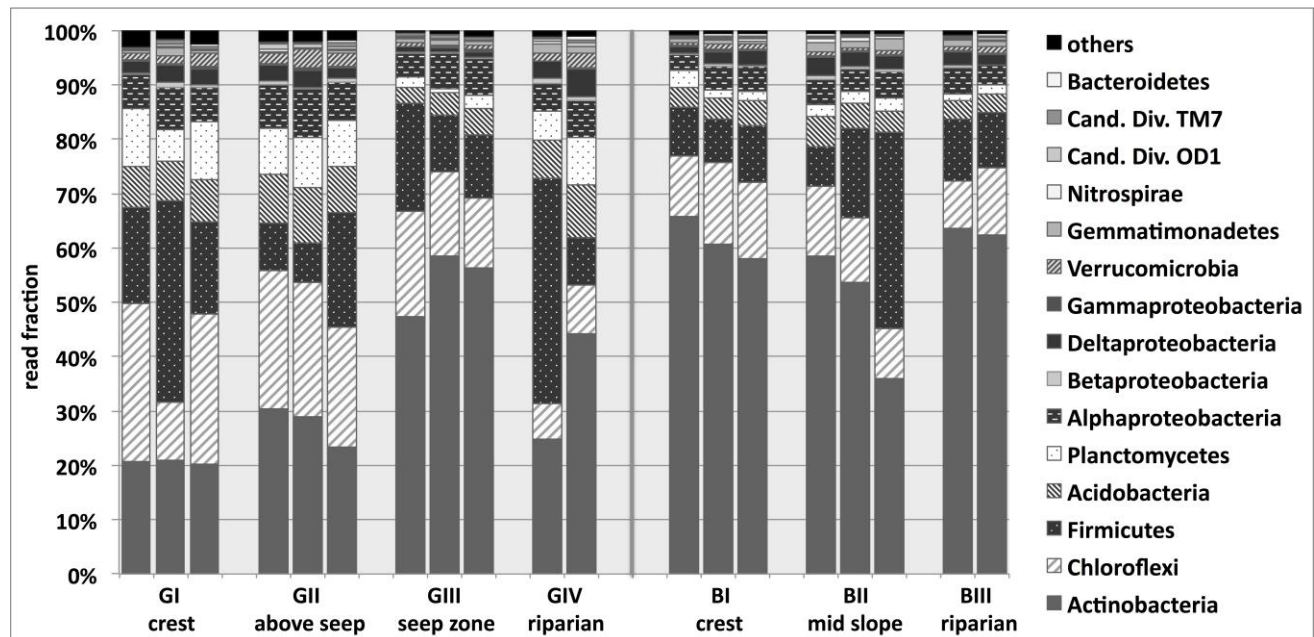

**Supplementary Figure 7:** Phylum-level taxonomic classification of sequences obtained from bacterial 16S rRNA gene-targeted Illumina sequencing of savanna soil samples taken from 5 cm depth at different locations along the granitic (GI-GIV) and the basaltic (BI-BIII) catena. Cand. Div. = Candidate Division. Results are based on sequence data before normalization and removal of singletons.
